# Supplementary material for: Production of leishmanin skin test antigen from Leishmania donovani for future reintroduction in the field
Source: Springer Nature journal article supplement (doi:10.1038/s41467-023-42732-2), 2023-11-02
Supplement: MOESM1 [file 41467_2023_42732_MOESM1_ESM.pdf]

**Production of Leishmanin Skin Test antigen from *Leishmania donovani* for  
future reintroduction in the field**

**SUPPLEMENTARY INFORMATION**

**A**

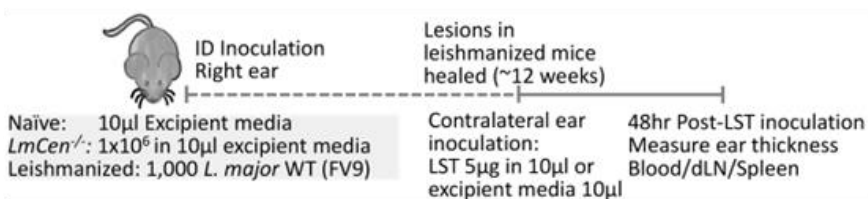

**B**

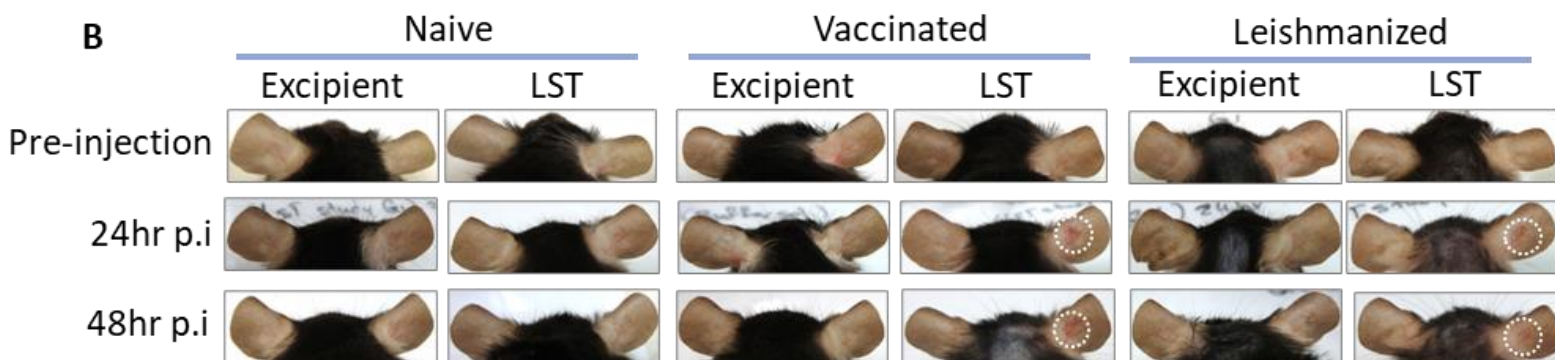

**C**

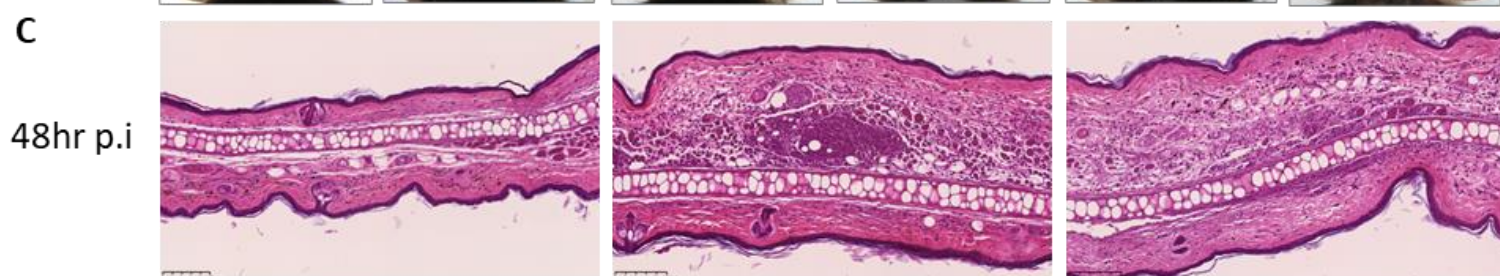

**D**

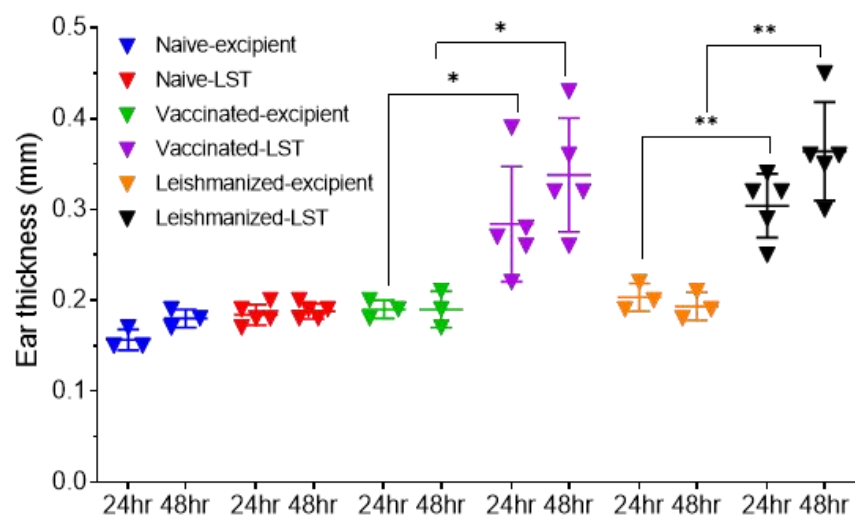

**Supplementary Figure 1: Reproducibility testing of *L. donovani* 1S2D soluble antigen as a surrogate of immunogenicity.** Healed wild-type *L. major* FV9 infected (leishmanized) or

attenuated *LmCen*<sup>-/-</sup> immunized C57BL/6 mice were contralaterally injected with 5 µg of *L. donovani* 1S2D soluble antigen or excipient. The Leishmanin skin test (LST) response was evaluated at 24 and 48hr post-inoculation (pi). **A)** Illustration of the experimental design. **B)** Photographs of mice ears taken before, 24 and 48 hr post-injection of soluble antigens. **C)** Representative ears stained with H&E (×20) at 48hr post-injection of soluble antigens. Scale bars 20 µm. **D)** The corresponding ear thickness. Unpaired two tailed Student's *t* test was used to calculate statistical significance between 24hr vaccinated-excipient and vaccinated-LST groups ( $p=0.0486$ ), 48hr vaccinated-excipient and vaccinated-LST groups ( $p=0.0083$ ), 24hr leishmanized-excipient and leishmanized-LST groups ( $p=0.0037$ ), 48hr leishmanized-excipient and leishmanized-LST groups ( $p=0.002$ ). Results are shown as mean ± SD, and data is representative of two independent experiments with 3-5 mice per group. \*,  $P \leq 0.05$ ; \*\*,  $P \leq 0.01$ ; \*\*\*,  $P \leq 0.001$ ; and \*\*\*\*,  $P \leq 0.0001$  comparing groups. Source data are provided as a Source Data file.

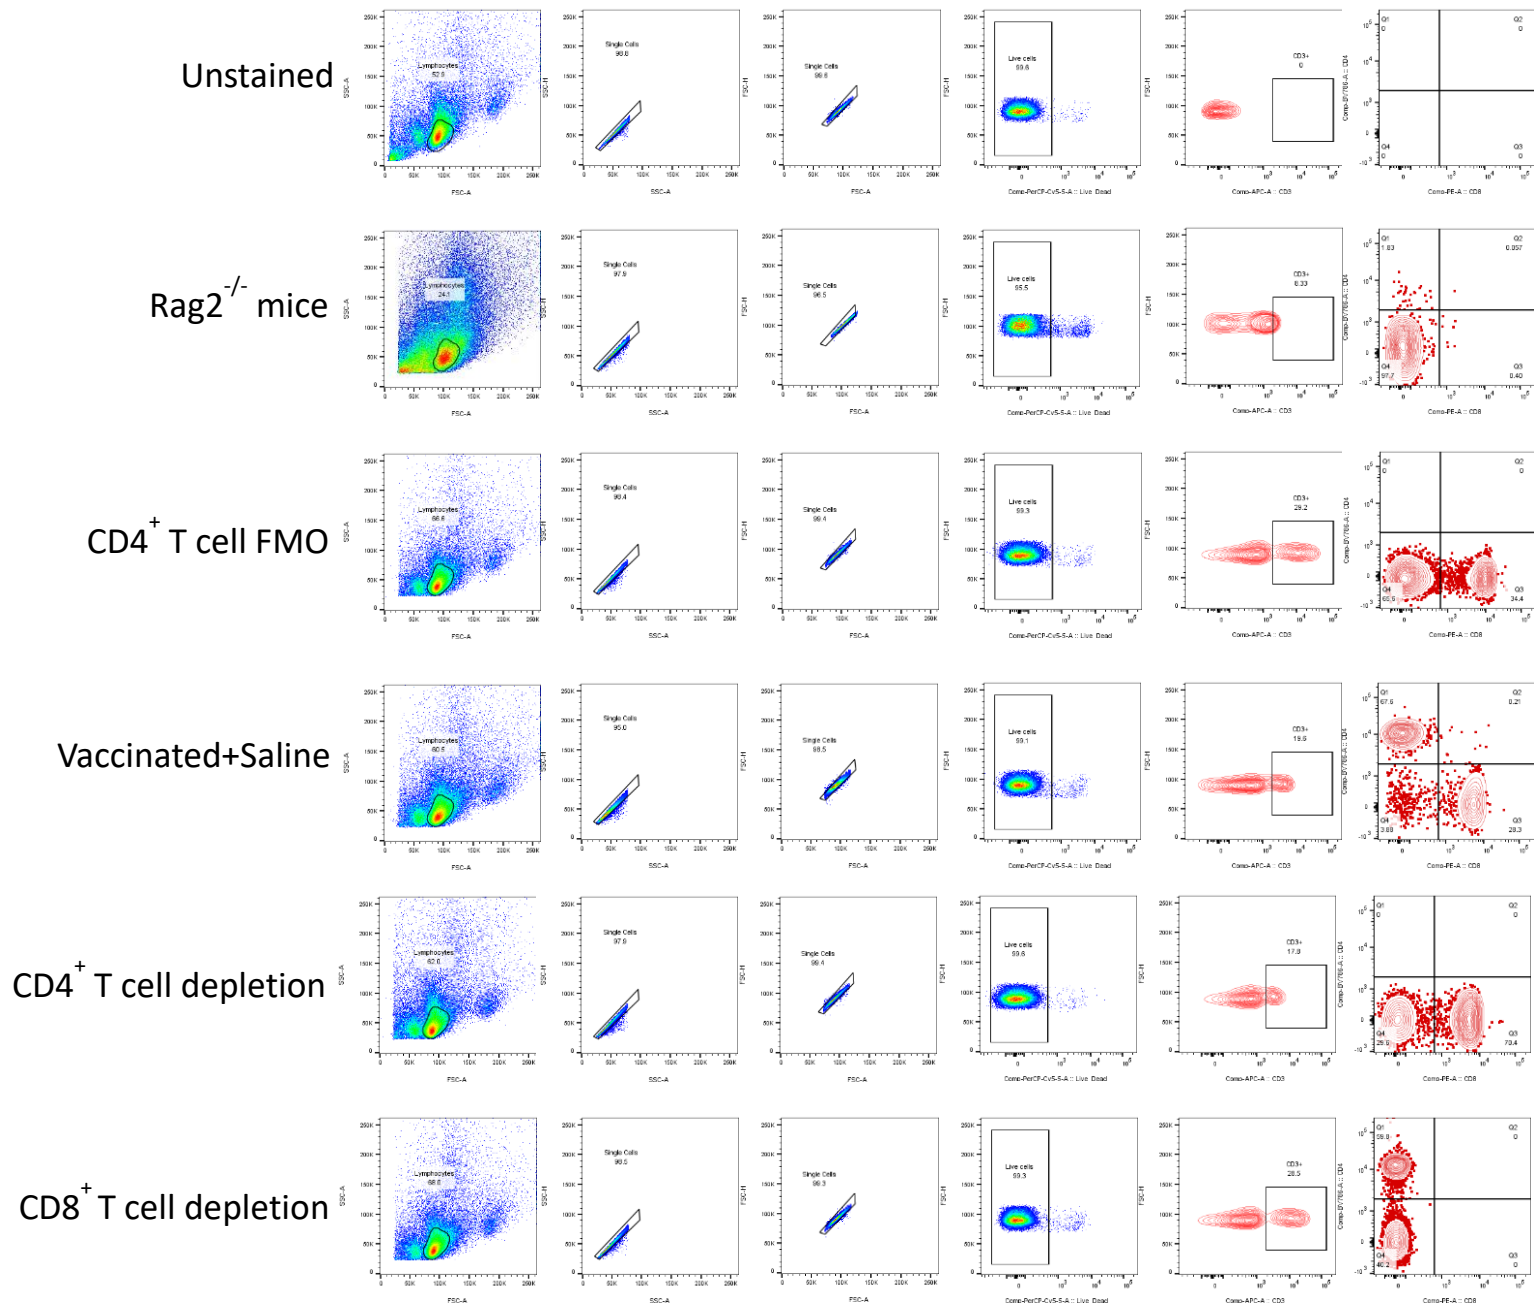

**Supplementary Figure 2:** CD4<sup>+</sup> or CD8<sup>+</sup> T cells were depleted in the wild-type *L. major* FV9 infected (leishmanized) or attenuated *LmCen*<sup>-/-</sup> immunized C57BL/6 mice with a single intraperitoneal injection of 500 µg of anti-CD4 mAb (clone GK1.5) or 300 µg of anti-CD8 mAb (clone YTS169.4), respectively. The cells depletion was confirmed in some sampled mice using flow cytometry. Representative flow cytometric dot plots showing the gating strategy. FMO, Fluorescence Minus One.

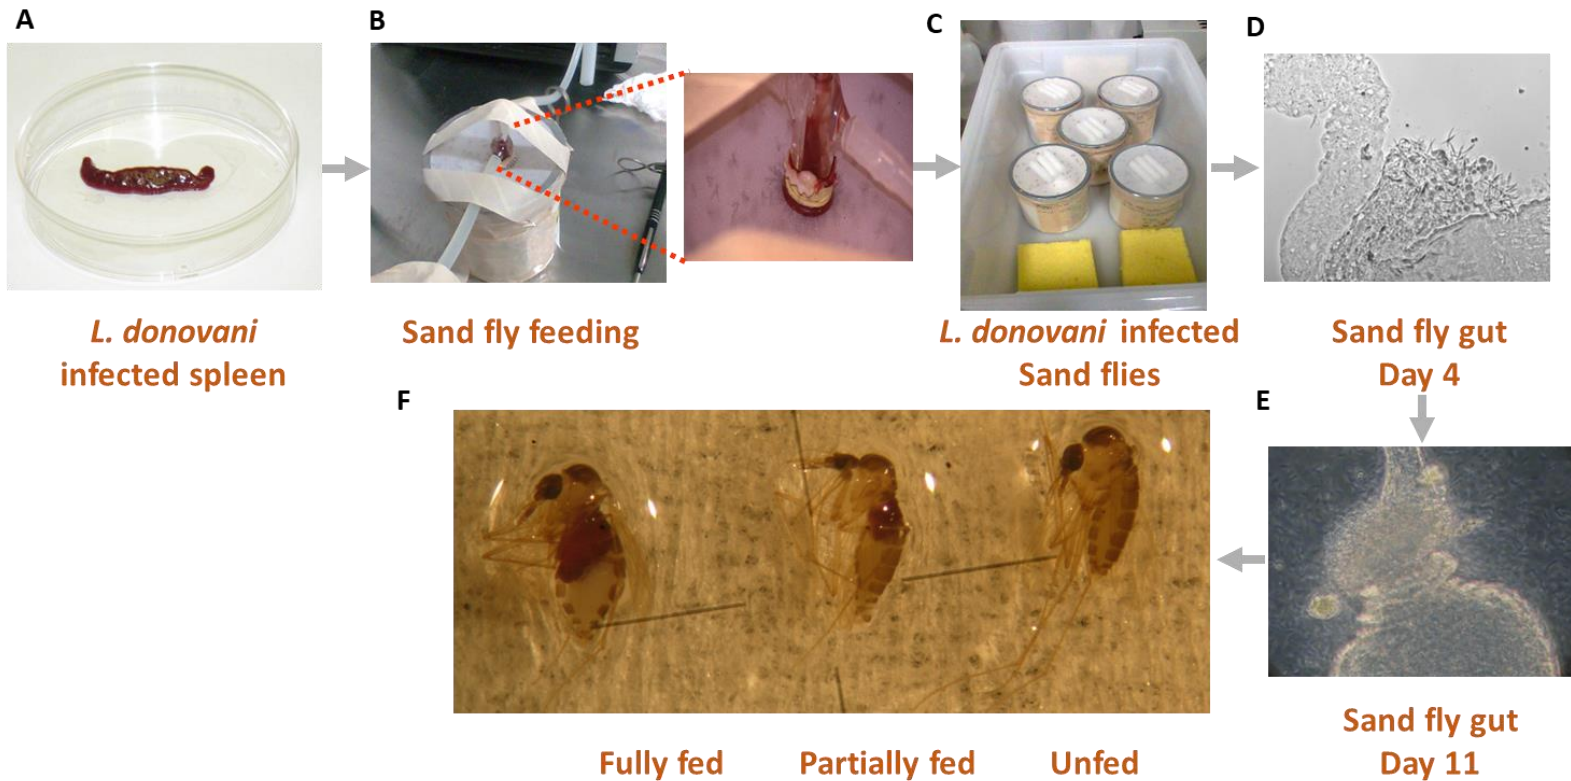

**Supplementary Figure 3: Schematic of sand fly mediated infections of hamsters with *L. donovani* Ld-Ind**

**A)** Spleen of a sick and moribund hamster infected with *L. donovani* Ld-Ind parasites was used as a source of parasites **B)** Sand flies were fed through chicken membrane, a closeup of the ongoing feeding is shown **C)** Fully blood fed sand flies were isolated and were kept in 26°C incubator **D)** At the indicated time points, a subset of sand flies was dissected and parasite growth in the midguts was monitored **E)** At day 11 post-feeding appearance of metacyclics at the anterior part of the gut indicated a mature infection and sand flies from such successful feeding were used to expose naïve hamsters **F)** Exposed sand flies were checked under microscope to count numbers of fully fed sand flies

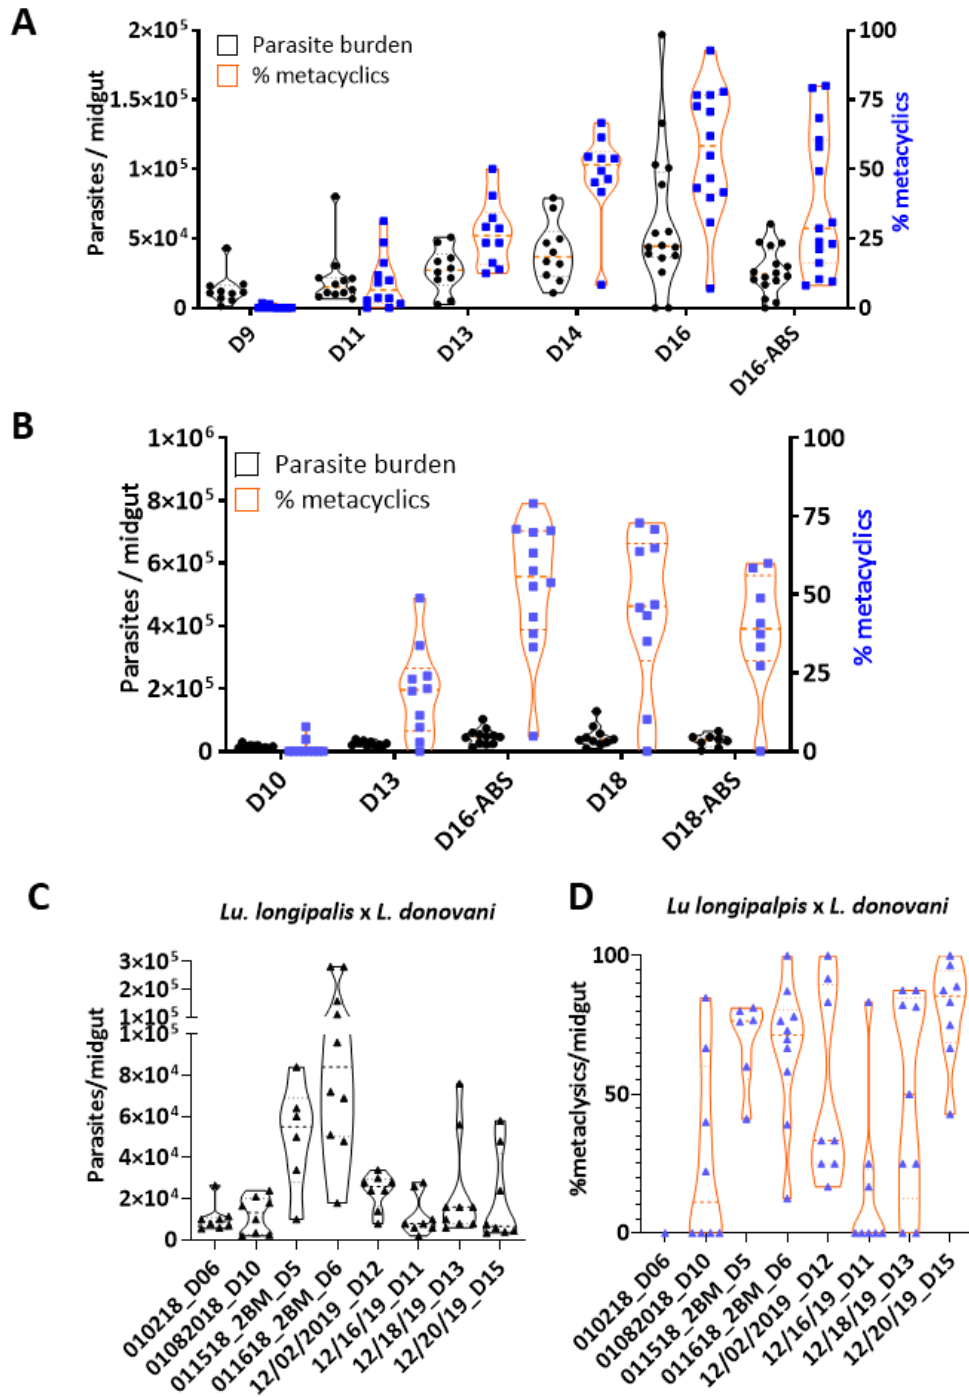

**Supplementary Figure 4: Reproducible cycling of *L. donovani* Ld-Ind through sand flies**

At different days of post artificial feeding through chicken membrane, sand flies were dissected, whole gut were homogenized in 50µl of PBS containing 0.1% formalin and the parasite numbers

were counted. A, B, C and D panels depict three independent experiments. Source data are provided as a Source Data file.

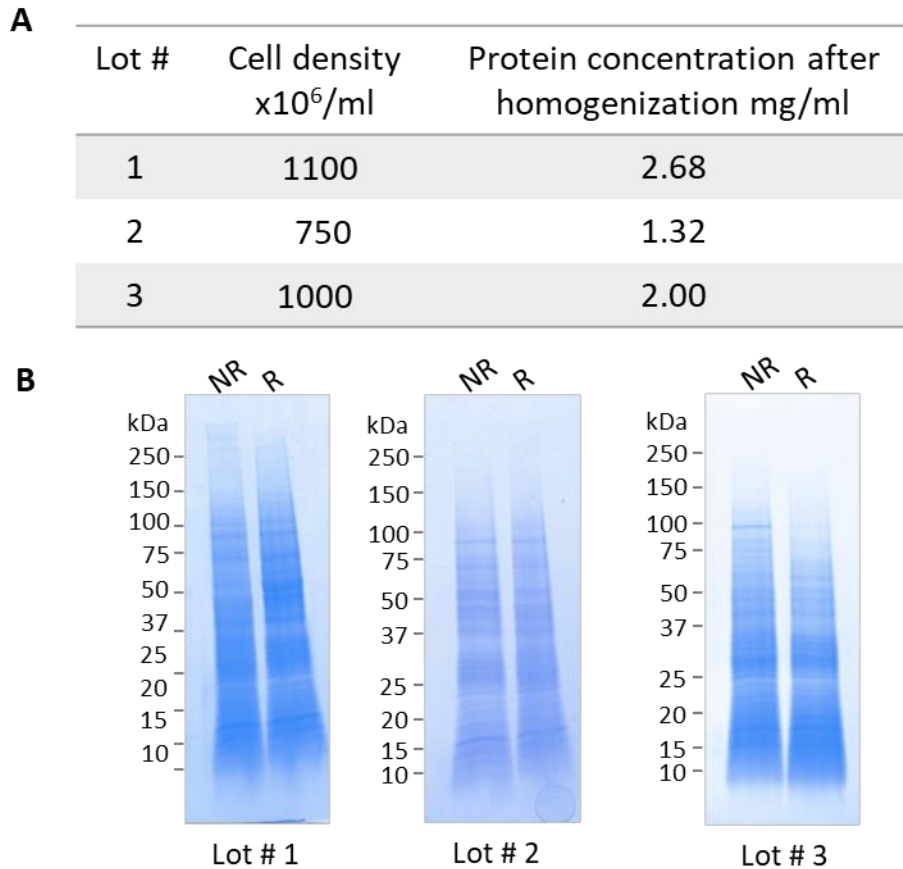

**Supplementary Figure 5: Reproducibility of parasite growth and antigen preparation in three different manufactured lots**

**A)** Parasite cultures in three additional manufactured lots showed consistent growth patterns in the bioreactor and yielded  $\geq 750 \times 10^6$  and a protein concentration  $\geq 1.32$  mg/ml. **B)** SDS-PAGE analysis showed a consistent banding pattern of GLP-LST antigens from three additional manufactured lots. NR, non-reducing. R, reducing.
